# Supplementary material for: Highly sensitive stretchable transparent piezoelectric nanogenerators
Source: Royal Society of Chemistry journal article supplement (doi:10.1039/c2ee23530g), 2012-11-01
Supplement: c2ee23530g.pdf [file c2ee23530g.pdf]

## Electronic Supplementary Information

### Highly Sensitive Stretchable Transparent Piezoelectric Nanogenerator

*Ju-Hyuck Lee,<sup>a</sup> Keun Young Lee,<sup>b</sup> Brijesh Kumar,<sup>b</sup> Nguyen Thanh Tien,<sup>b</sup> Nae-Eung Lee,<sup>ab</sup> and Sang-Woo Kim<sup>\*ab</sup>*

<sup>a</sup> SKKU Advanced Institute of Nanotechnology (SAINT), Center for Human Interface Nanotechnology (HINT), SKKU-Samsung Graphene Center, Sungkyunkwan University (SKKU), Republic of Korea

<sup>b</sup> School of Advanced Materials Science and Engineering, Sungkyunkwan University (SKKU), Republic of Korea

\*E-mail: kimsw1@skku.edu

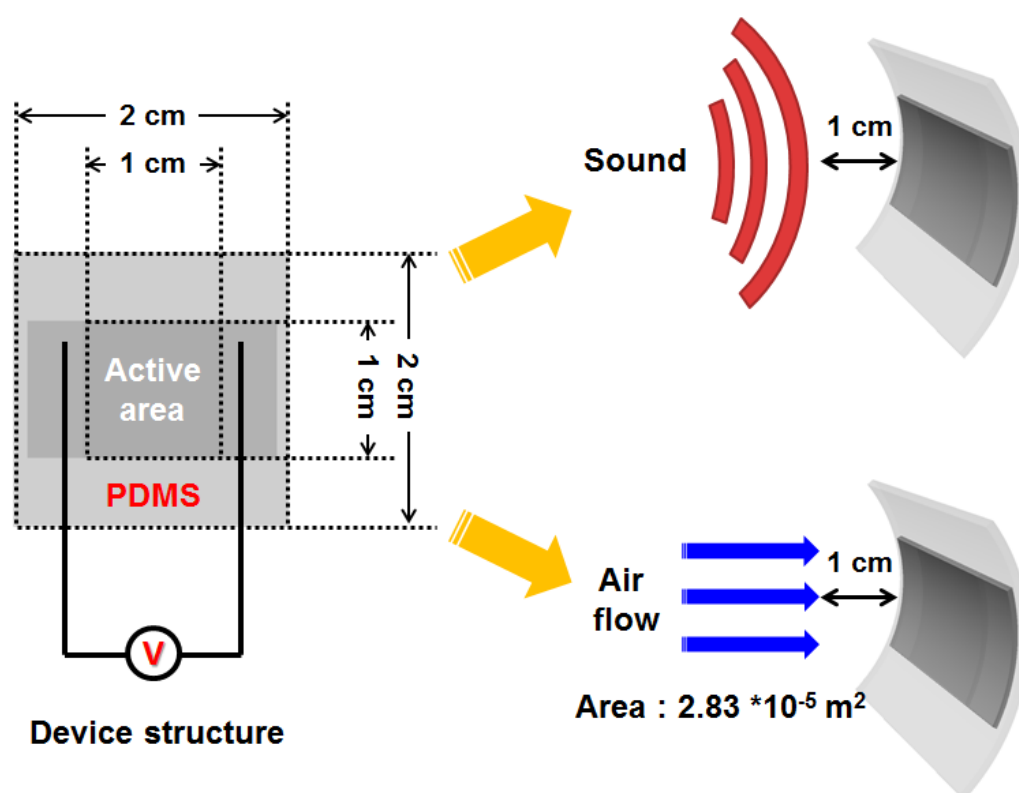

**Figure S1.** An illustration of an experimental setup to investigate the output performance of stretchable NG and normal NG using sound wave and air flow.
